# Supplementary material for: Mac-/Lactosylceramide regulates intestinal homeostasis and secretory cell fate commitment by facilitating Notch signaling
Source: eLife. 2025 Dec 23;14:RP106184. doi: 10.7554/eLife.106184 (PMC12726828; doi:10.7554/eLife.106184)
Supplement: Source data 1. [file elife-106184-data1.xlsx]

## Sheet: Fig1 C&D
control			EA30			E230			GlcT delta8
cell number	ee number	ee percentage	cell number	ee number	ee percentage	cell number	ee number	ee percentage	cell number	ee number	ee percentage
28	3	0.107143	52	30	0.576923	42	18	0.428571	60	35	0.583333
17	2	0.117647	26	10	0.384615	59	30	0.508475	106	67	0.632075
12	1	0.0833333	42	32	0.761905	36	13	0.361111	73	39	0.534247
24	4	0.166667	48	27	0.5625	68	37	0.544118	91	52	0.571429
10	1	0.1	83	55	0.662651	40	26	0.65	83	49	0.590361
15	2	0.133333	67	34	0.507463	73	38	0.520548	91	68	0.747253
18	3	0.166667	71	43	0.605634	65	38	0.584615	73	51	0.69863
10	0	0	83	49	0.590361	29	14	0.482759	68	39	0.573529
27	5	0.185185	35	26	0.742857	38	20	0.526316	57	41	0.719298
13	2	0.153846	76	45	0.592105	47	24	0.510638	88	59	0.670455
22	4	0.181818	61	39	0.639344	69	35	0.507246	45	27	0.6
26	2	0.0769231	57	31	0.54386	28	19	0.678571	63	48	0.761905
21	3	0.142857	82	48	0.585366	54	32	0.592593	94	64	0.680851
34	6	0.176471	98	63	0.642857	36	16	0.444444	86	42	0.488372
27	4	0.148148	68	42	0.617647	76	41	0.539474	59	45	0.762712
14	1	0.0714286	73	40	0.547945	56	39	0.696429	74	46	0.621622
13	2	0.153846	55	37	0.672727	60	29	0.483333	69	30	0.434783
37	4	0.108108	81	39	0.481481	57	29	0.508772	96	66	0.6875
24	2	0.0833333	65	43	0.661538	63	28	0.444444	48	38	0.791667

## Sheet: Fig1 F
EA30			EA30;U-GlcT			E230			E230;U-GlcT
cell number	ee number	ee percentage	cell number	ee number	ee percentage	cell number	ee number	ee percentage	cell number	ee number	ee percentage
60	45	0.75	20	3	0.15	68	29	0.426471	16	2	0.125
67	53	0.791045	15	3	0.2	47	24	0.510638	19	3	0.157895
53	29	0.54717	21	2	0.0952381	54	36	0.666667	14	2	0.142857
72	48	0.666667	8	0	0	48	21	0.4375	35	1	0.0285714
59	46	0.779661	15	1	0.0666667	71	39	0.549296	22	3	0.136364
61	26	0.42623	17	1	0.0588235	57	31	0.54386	16	1	0.0625
43	26	0.604651	30	1	0.0333333	64	46	0.71875	21	1	0.047619
74	40	0.540541	18	2	0.111111	73	50	0.684932	30	1	0.0333333
56	27	0.482143	17	2	0.117647	60	43	0.716667	12	1	0.0833333
64	44	0.6875	23	2	0.0869565	52	25	0.480769	23	2	0.0869565
71	51	0.71831	13	1	0.0769231	66	39	0.590909	25	2	0.08

## Sheet: Fig1 H
control	esgts>GlcT-IR-1	esgts>GlcT-IR-2
8	36	21
10	27	21
15	24	19
8	39	10
6	37	30
5	28	59
8	26	26
13	30	25
9	32	21
5	31	27
13	22	16
8		25
3		31
3		28
7		35
17		44
4		32
4		48
8		45
6		47
8		32
9		36
6		39
13		41
6		33
15
10
7
6

## Sheet: Fig1 J
control	esgts>GlcT-IR-1	esgts>GlcT-IR-2
15	14	42
19	36	50
14	42	60
8	62	45
9	30	70
11	52	67
14	25	82
15	49	63
14	40	47
19	67	72
18	55	62
7	43	65
15		50
14		51
19		80
18		83
10		54
		59
		82
		74
		83
		64
		62
		69
		48
		60
		72
		55
		54
		45
		70
		66
		71
		74
		50
		49
		62
		54
		73
		62
		50

## Sheet: Fig 2 C
GlcT delta8			GlcT delta8; U-P35
cell number	ee number	ee percentage	cell number	ee number	ee percentage
78	59	0.75641	87	39	0.448276
56	31	0.553571	59	37	0.627119
64	54	0.84375	63	46	0.730159
82	46	0.560976	127	109	0.858268
74	40	0.540541	113	97	0.858407
59	23	0.389831	56	21	0.375
63	41	0.650794	94	45	0.478723
85	67	0.788235	80	59	0.7375
97	58	0.597938	67	37	0.552239
43	27	0.627907	95	38	0.4
113	83	0.734513	81	68	0.839506
67	43	0.641791	77	42	0.545455
73	57	0.780822	68	47	0.691176
109	69	0.633028	61	30	0.491803
91	50	0.549451	73	58	0.794521

## Sheet: Fig2 D
GlcT-1Δ8			GlcT-1Δ8; U-CDase
cell number	ee number	ee percentage	cell number	ee number	ee percentage
68	59	0.867647	97	39	0.402062
80	31	0.3875	62	37	0.596774
78	54	0.692308	57	46	0.807018
98	46	0.469388	38	20	0.526316
65	40	0.615385	88	67	0.761364
35	23	0.657143	69	57	0.826087
52	41	0.788462	76	45	0.592105
98	67	0.683673	94	59	0.62766
67	58	0.865672	81	37	0.45679
68	27	0.397059	67	38	0.567164
83	58	0.698795	24	18	0.75
97	82	0.845361	84	42	0.5
67	40	0.597015	65	47	0.723077
38	29	0.763158	48	30	0.625
87	69	0.793103	35	28	0.8

## Sheet: Fig2 F&G
control			eghA			eghB			egh7			brn228			β4GalNAcTA			α4GT1
cell number	ee number	ee percentage	cell number	ee number	ee percentage	cell number	ee number	ee percentage	cell number	ee number	ee percentage	cell number	ee number	ee percentage	cell number	ee number	ee percentage	cell number	ee number	ee percentage
33	4	0.121212	88	30	0.340909	109	37	0.33945	82	44	0.536585	23	4	0.173913	24	4	0.166667	27	4	0.148148
22	2	0.0909091	76	40	0.526316	132	94	0.712121	46	19	0.413043	26	2	0.0769231	11	2	0.181818	15	2	0.133333
41	5	0.121951	98	34	0.346939	73	23	0.315068	96	35	0.364583	32	4	0.125	27	5	0.185185	24	5	0.208333
32	5	0.15625	54	26	0.481481	113	52	0.460177	68	15	0.220588	15	2	0.133333	19	2	0.105263	27	4	0.148148
18	2	0.111111	80	30	0.375	86	56	0.651163	87	40	0.45977	12	1	0.0833333	33	6	0.181818	33	6	0.181818
28	4	0.142857	103	62	0.601942	45	14	0.311111	73	39	0.534247	28	4	0.142857	27	4	0.148148	36	6	0.166667
31	4	0.129032	113	44	0.389381	65	42	0.646154	47	31	0.659574	13	2	0.153846	25	4	0.16	17	2	0.117647
20	3	0.15	121	62	0.512397	143	60	0.41958	72	41	0.569444	31	5	0.16129	29	4	0.137931	22	4	0.181818
31	2	0.0645161	123	59	0.479675	85	58	0.682353	112	21	0.1875	26	2	0.0769231	17	2	0.117647	27	4	0.148148
16	2	0.125	78	39	0.5	76	45	0.592105	80	22	0.275	15	2	0.133333	25	4	0.16	24	2	0.0833333
26	2	0.0769231	97	30	0.309278	129	34	0.263566	63	18	0.285714	19	4	0.210526	29	5	0.172414	29	4	0.137931
32	4	0.125	76	33	0.434211	104	75	0.721154	116	36	0.310345	27	2	0.0740741	24	2	0.0833333	20	4	0.2
26	2	0.0769231	79	45	0.56962	98	64	0.653061	78	26	0.333333	28	3	0.107143	33	4	0.121212	34	5	0.147059
19	2	0.105263	84	53	0.630952	135	32	0.237037	34	14	0.411765	31	6	0.193548	29	4	0.137931	31	4	0.129032
31	2	0.0645161	133	25	0.18797	118	79	0.669492	126	40	0.31746	28	4	0.142857	38	6	0.157895	27	2	0.0740741
33	4	0.121212	24	6	0.25	63	20	0.31746	73	28	0.383562	19	3	0.157895	21	2	0.0952381	19	2	0.105263
36	5	0.138889	102	49	0.480392	125	73	0.584	138	32	0.231884	34	5	0.147059	20	2	0.1	23	4	0.173913
38	6	0.157895	148	95	0.641892	139	92	0.661871	58	11	0.189655	36	6	0.166667	16	1	0.0625	27	4	0.148148
41	4	0.097561	111	34	0.306306	121	76	0.628099	59	21	0.355932	25	2	0.08	28	4	0.142857	26	4	0.153846
13	1	0.0769231	125	71	0.568	135	93	0.688889	86	16	0.186047	23	4	0.173913	24	2	0.0833333	22	3	0.136364
38	4	0.105263	134	66	0.492537	154	83	0.538961	94	39	0.414894	11	0	0	10	1	0.1	21	2	0.0952381
21	3	0.142857	48	30	0.625	104	62	0.596154	76	44	0.578947	21	4	0.190476	35	5	0.142857	37	5	0.135135

## Sheet: Fig3 B&C
Control						GlcT-d8
DMSO			LacCer			DMSO						LacCer
						anterior			posterior			anterior			posterior
cell number	ee number	ee percentage	cell number	ee number	ee percentage	cell number	ee number	ee percentage	cell number	ee number	ee percentage	cell number	ee number	ee percentage	cell number	ee number	ee percentage
13	1	0.0769231	20	2	0.1	98	59	0.602041	83	45	0.542169	25	4	0.16	132	34	0.257576
21	2	0.0952381	13	0	0	45	22	0.488889	57	17	0.298246	93	11	0.11828	105	59	0.561905
15	0	0	25	3	0.12	26	17	0.653846	102	74	0.72549	68	14	0.205882	95	37	0.389474
24	3	0.125	22	1	0.0454545	43	15	0.348837	163	106	0.650307	114	23	0.201754	78	28	0.358974
14	2	0.142857	14	1	0.0714286	83	49	0.590361	93	53	0.569892	71	16	0.225352	36	4	0.111111
16	1	0.0625	18	2	0.111111	127	91	0.716535	68	28	0.411765	85	35	0.411765	129	56	0.434109
31	4	0.129032	27	4	0.148148	94	53	0.56383	97	56	0.57732	119	16	0.134454	86	32	0.372093
24	4	0.166667	37	4	0.108108	112	78	0.696429	117	89	0.760684	106	9	0.0849057	47	10	0.212766
25	4	0.16	19	2	0.105263	77	41	0.532468	54	29	0.537037	80	42	0.525	90	8	0.0888889
26	4	0.153846	26	4	0.153846	135	92	0.681481	73	41	0.561644	57	9	0.157895	114	51	0.447368
17	2	0.117647	23	2	0.0869565	84	33	0.392857	92	42	0.456522	83	7	0.0843373	152	58	0.381579
32	4	0.125	31	4	0.129032	35	20	0.571429	157	117	0.745223	103	24	0.23301	73	20	0.273973
15	2	0.133333	27	4	0.148148	103	65	0.631068	169	103	0.609467	58	25	0.431034	119	62	0.521008
28	4	0.142857	18	2	0.111111	88	60	0.681818	68	44	0.647059	97	6	0.0618557	82	11	0.134146
23	2	0.0869565	15	0	0	121	73	0.603306	34	20	0.588235	121	43	0.355372	174	82	0.471264
26	5	0.192308	23	2	0.0869565	76	25	0.328947	134	52	0.38806	63	16	0.253968	155	86	0.554839
36	6	0.166667	25	4	0.16	21	13	0.619048	179	128	0.715084	75	11	0.146667	68	20	0.294118
27	4	0.148148	22	4	0.181818	52	11	0.211538	81	45	0.555556	121	35	0.289256	77	33	0.428571
19	2	0.105263	31	5	0.16129	138	101	0.731884	23	11	0.478261	56	27	0.482143	121	87	0.719008
25	4	0.16	24	2	0.0833333	91	46	0.505495	142	96	0.676056	82	8	0.097561	143	65	0.454545

## Sheet: Fig4 B
Control		GlcT delta8
Outside	Clone	Outside	Clone
60.6	76.45	75.75	13.34
72.6	58.12	73.12	64.72
70.96	73.6	74.2	10.13
72.34	67.18	65.94	33.18
65.44	64.13	79.04	10.12
72.54	65.99	46.18	15.19
70.23	65	70.34	12.13
62	65	64.37	9.97
67	69.65	69.35	12.08

## Sheet: Fig5 B
Dl						NRE
GFP			GlcT-IR			GFP			GlcT-IR
cell number	ee number	ee percentage	cell number	ee number	ee percentage	cell number	ee number	ee percentage	cell number	ee number	ee percentage
89	4	0.0449438	86	39	0.453488	82	9	0.109756	84	16	0.190476
64	8	0.125	92	54	0.586957	64	2	0.03125	105	15	0.142857
94	14	0.148936	102	47	0.460784	72	6	0.0833333	73	2	0.0273973
68	7	0.102941	83	40	0.481928	82	11	0.134146	111	8	0.0720721
77	6	0.0779221	105	37	0.352381	80	13	0.1625	88	9	0.102273
92	8	0.0869565	113	64	0.566372	117	8	0.0683761	78	11	0.141026
106	13	0.122642	107	44	0.411215	89	5	0.0561798	67	5	0.0746269
73	9	0.123288	86	22	0.255814	94	14	0.148936	82	6	0.0731707
69	5	0.0724638	79	34	0.43038	75	11	0.146667	72	3	0.0416667
114	19	0.166667	106	25	0.235849	86	16	0.186047	61	10	0.163934
86	3	0.0348837	92	56	0.608696	93	8	0.0860215	78	14	0.179487
87	1	0.0114943	85	33	0.388235	109	6	0.0550459	65	2	0.0307692
79	9	0.113924	96	54	0.5625	92	1	0.0108696	114	7	0.0614035

[truncated: 4 more sheets: Fig5 D, Fig5 F, Fig7 B, fig7 D]
